# Supplementary material
Source: PubMed Central journal article supplement (PMC2866012)
Supplement: NIHMS189336-supplement-1_si_001.pdf [file NIHMS189336-supplement-1_si_001.pdf]

**Supporting Information for:**

**Proteomic analysis reveals virus-specific Hsp25  
modulation in cardiac myocytes**

Lianna Li <sup>†</sup>, Joel R. Sevinsky <sup>§, ‡</sup>, Megan D. Rowland <sup>§</sup>, Jonathan L. Bundy <sup>§</sup>, James L. Stephenson <sup>§</sup>, and Barbara Sherry <sup>‡,\*</sup>

<sup>†</sup>Department of Molecular Biomedical Sciences, North Carolina State University, Raleigh, North Carolina, 27606, and <sup>§</sup> Biomarker and Systems Biology Research Group, Research Triangle Institute, Research Triangle Park, NC 27709.

<sup>‡</sup> Current address: Luca Technologies, Golden, Colorado, 80401

\* Correspondence should be addressed to: Barbara Sherry, Department of Molecular Biomedical Sciences, North Carolina State University, College of Veterinary Medicine, 4700 Hillsborough St., Raleigh, NC 27606. Tel.: 919-515-4480; fax: 919-513-7301; e-mail: [barbara\\_sherry@ncsu.edu](mailto:barbara_sherry@ncsu.edu)

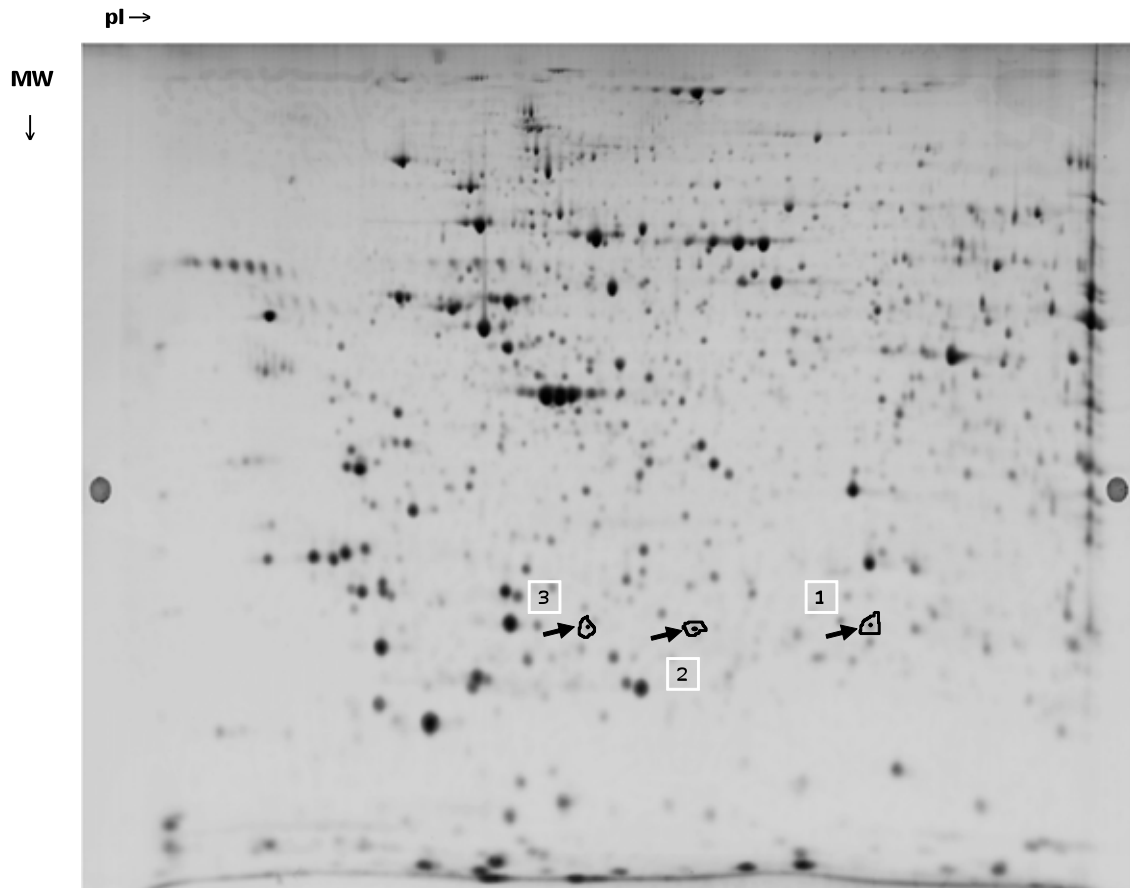

**Supplemental Fig. 1. Hsp25 2D-DIGE gel spots and peptide masses.** The three proteins picked and identified as Hsp25 are indicated on this image of the master gel. They have the same molecular weight, but vary from the more basic (protein #1) to more acidic (protein #3).

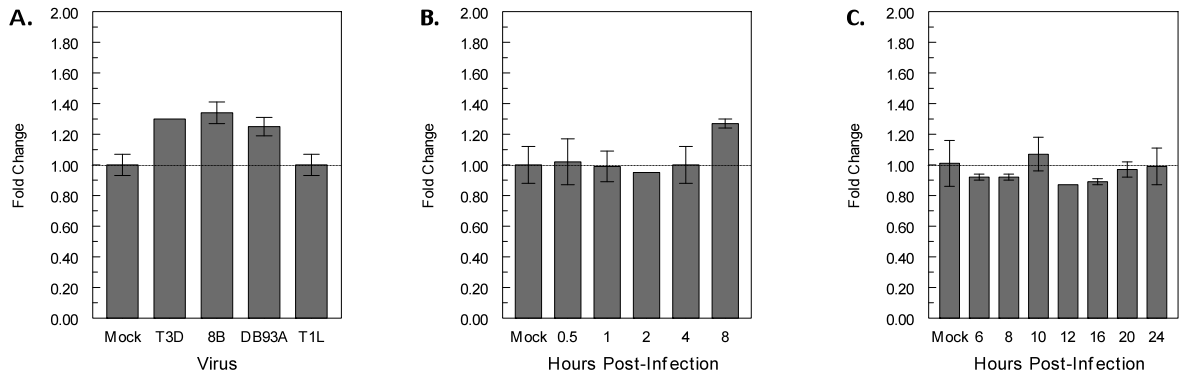

**Supplemental Fig. 2. Reovirus modulation of Hsp25 is post-transcriptional.**

Primary cardiac myocyte cultures were mock- or reovirus-infected (moi 10 pfu per cell), and RNA was harvested at the indicated times post-infection for qRT-PCR. Copy number for each sample was first normalized to GAPDH, and then samples from reovirus-infected cultures were normalized to those from mock-infected cultures at that same time point. Results are expressed as the average of duplicate wells  $\pm$  standard deviation. A) Infected with indicated reovirus strain and harvested at 10 hours post-infection. B and C) Infected with T3D and harvested at indicated time post-infection.

**Supplemental Table 1. Biological function of differentially expressed proteins in 8B-infected primary cardiac myocyte cultures.**

| <b>Category</b>                       | <b>P-value</b>      | <b>Gene Name for Protein</b>                                                           |
|---------------------------------------|---------------------|----------------------------------------------------------------------------------------|
| Inflammatory Response                 | 1.05E-02 - 3.63E-02 | GSN, DCTN2                                                                             |
| Post-Translational Modification       | 5.58E-07 - 1.05E-02 | PLOD2, P4HB, PDIA3, PPP1CB, HSPA5, GSN, HSPA4, P4HA1, GSPT1, ERP29, PDIA6, UBA1, PLOD3 |
| Protein Folding                       | 7.75E-03 - 7.75E-03 | ERP29, PDIA6, HSPA5                                                                    |
| Free Radical Scavenging               | 1.57E-02 - 1.57E-02 | GSN                                                                                    |
| Amino Acid Metabolism                 | 5.58E-07 - 5.27E-03 | P4HA1, P4HB, PLOD3                                                                     |
| Organismal Development                | 5.27E-03 - 4.14E-02 | TOP1, RAD23B, DCTN2, PRKAR1A                                                           |
| Reproductive Development and Function | 2.09E-02 - 2.09E-02 | TOP1                                                                                   |
| Organismal Functions                  | 1.57E-02 - 1.57E-02 | DCTN2                                                                                  |
| Respiratory Disease                   | 6.94E-06 - 3.11E-02 | ALDH1B1, P4HB, HSP90B1, TOP1, ENO1, PDIA3, HSPA5, GSN                                  |
| Gastrointestinal Disease              | 5.27E-03 - 3.43E-02 | PLOD2, COL1A1, P4HA1, HSP90B1, P4HB, TOP1, FSCN1, CALD1, UBA1, HSPA5, GSN, GLG1        |
| Renal and Urological Disease          | 4.89E-03 - 2.09E-02 | TOP1, HSPA1B, PRKAR1A                                                                  |

**Supplemental Table 2. Mascot analysis (combined PMF- MS/MS) of Spot #1 <sup>1</sup>**

| Observed Mr <sup>2</sup> | Exper. Mr | Calc. Mr | Delta | AA<br>Start | AA<br>End | Miss | Ions | Peptide           |
|--------------------------|-----------|----------|-------|-------------|-----------|------|------|-------------------|
| 927.60                   | 926.59    | 926.48   | 0.11  | 193         | 202       | 0    | -    | AQIGGPEAGK        |
| 931.60                   | 930.59    | 930.50   | 0.09  | 119         | 127       | 0    | -    | EGVVEITGK         |
| 1005.57                  | 1004.56   | 1004.47  | 0.09  | 13          | 20        | 0    | 48   | SPSWEPFR          |
| 1031.57                  | 1030.56   | 1030.46  | 0.10  | 21          | 28        | 0    | 49   | DWYPAHSR          |
| 1075.67                  | 1074.67   | 1074.57  | 0.10  | 84          | 93        | 0    | 28   | QLSSGVSEIR        |
| 1104.61                  | 1103.60   | 1103.50  | 0.10  | 132         | 140       | 0    | 62   | QDEHGYISR         |
| 1149.71                  | 1148.71   | 1148.60  | 0.11  | 29          | 38        | 0    | 91   | LFDQAFGVPR        |
| 1798.10                  | 1797.10   | 1796.93  | 0.17  | 101         | 116       | 0    | 49   | VSLDVNHFAPEELTVK  |
| 1833.14                  | 1832.13   | 1831.97  | 0.17  | 176         | 192       | 0    | 81   | AVTQSAEITIPVTFEAR |

<sup>1</sup> Most basic spot; putative unphosphorylated Hsp25: (P14602) Heat shock 27 kDa protein (Hsp 27, Hsp 25), Mass: 23000, Protein Score: 459

<sup>2</sup> Additional peptides for which there was no match (and which could include post-translationally modified Hsp25 peptides): 1009.57, 1018.57, 1021.57, 1021.57, 1035.56, 1037.57, 1037.57, 1047.56, 1051.56, 1053.56, 1058.65, 1062.58, 1063.57, 1079.59, 1087.58, 1095.62, 1126.66, 1134.72, 1148.68, 1161.72, 1171.70, 1175.73, 1187.67, 1203.64, 1314.91, 1332.86, 1424.89, 1499.93, 1528.96, 1630.01, 1634.08, 1701.05, 1820.09, 1847.15, 1923.11, 1941.12, 1985.25, 1987.26, 2003.27, 2079.31, 2079.31, 2091.33, 2230.41, 2233.41, 2285.38, 2288.29, 2304.27, 2316.32, 2319.22, 2331.24, 2334.50, 2435.47, 2440.26, 2596.41, 2679.57, 3065.97, 3110.93, 3194.04, 3347.02

**Supplemental Table 3. Mascot analysis (combined PMF- MS/MS) of Spot #2 <sup>1</sup>**

| Observed Mr <sup>2</sup> | Exper. Mr | Calc. Mr | Delta | AA Start | AA End | Miss | Ions | Peptide           |
|--------------------------|-----------|----------|-------|----------|--------|------|------|-------------------|
| 927.58                   | 926.58    | 926.48   | 0.09  | 193      | 202    | 0    | ---- | AQIGGPEAGK        |
| 1005.56                  | 1004.55   | 1004.47  | 0.08  | 13       | 20     | 0    | 36   | SPSWEFPR          |
| 1031.55                  | 1030.54   | 1030.46  | 0.08  | 21       | 28     | 0    | 51   | DWYPAHSR          |
| 1075.66                  | 1074.65   | 1074.57  | 0.08  | 84       | 93     | 0    | 2    | QLSSGVSEIR        |
| 1104.59                  | 1103.59   | 1103.50  | 0.09  | 132      | 140    | 0    | 60   | QDEHGYISR         |
| 1149.70                  | 1148.69   | 1148.60  | 0.09  | 29       | 38     | 0    | 73   | LFDQAFGVPR        |
| 1798.08                  | 1797.07   | 1796.93  | 0.14  | 101      | 116    | 0    | 50   | VSLDVNHFAPEELTVK  |
| 1833.11                  | 1832.11   | 1831.97  | 0.14  | 176      | 192    | 0    | 74   | AVTQSAEITIPVTFEAR |

<sup>1</sup> Middle spot; putative mono-phosphorylated Hsp25: (P14602) Heat shock 27 kDa protein (Hsp 27, Hsp 25), Mass: 23000, Score: 388

<sup>2</sup> Additional peptides for which there was no match (and which could include post-translationally modified Hsp25 peptides): 990.36, 1009.56, 1021.56, 1035.55, 1037.55, 1047.57, 1058.63, 1061.57, 1063.55, 1063.55, **1085.53**, 1087.56, 1089.56, 1101.52, 1117.52, 1126.65, 1148.65, 1165.68, 1171.69, 1175.72, 1187.65, 1194.75, 1203.62, 1314.87, 1345.85, 1424.88, 1528.93, 1569.98, 1629.97, 1634.06, 1701.03, 1720.99, 1794.95, 1820.07, 1923.07, 1941.10, 1969.21, 1987.23, 1987.23, 2003.23, 2079.28, 2079.28, 2091.30, 2230.38, 2265.22, 2297.39, 2316.30, 2317.24, 2334.47, 2408.25, 2564.39, 2663.59, 2679.56, 3065.95, 3094.89, 3111.90, 3194.05, 3339.01, 3346.95, 3355.06. The peptide in **bold** is absent in the putative non-phosphorylated Hsp25 (Supplemental Table 1), is present in both this putative mono-phosphorylated Hsp25 and di-phosphorylated Hsp25 (Supplemental Table 3), matches the Exper. Mr for a peptide comprised of residues 13 – 20 with a single phosphorylation, is predicted to be phosphorylated on serine 15

by NetPhos 2.0 software, and includes a serine residue previously shown by others to be phosphorylated (serine 15).

**Supplemental Table 4. Mascot analysis (combined PMF- MS/MS) of Spot #3 <sup>1</sup>**

| Observed Mr <sup>2</sup> | Exper. Mr | Calc. Mr | Delta | AA Start | AA End | Miss | Ions | Peptide           |
|--------------------------|-----------|----------|-------|----------|--------|------|------|-------------------|
| 927.58                   | 926.57    | 926.48   | 0.09  | 193      | 202    | 0    | ---- | AQIGGPEAGK        |
| 931.59                   | 930.58    | 930.50   | 0.08  | 119      | 127    | 0    | ---- | EGVVEITGK         |
| 932.57                   | 931.56    | 931.46   | 0.10  | 94       | 100    | 1    | ---- | QTADRWR           |
| 1031.55                  | 1030.55   | 1030.46  | 0.08  | 21       | 28     | 0    | 48   | DWYPAHSR          |
| 1104.59                  | 1103.59   | 1103.50  | 0.09  | 132      | 140    | 0    | 38   | QDEHGYSR          |
| 1149.70                  | 1148.69   | 1148.60  | 0.09  | 29       | 38     | 0    | 68   | LFDQAFGVPR        |
| 1798.08                  | 1797.07   | 1796.93  | 0.14  | 101      | 116    | 0    | 49   | VSLDVNHFAPEELTVK  |
| 1833.12                  | 1832.11   | 1831.97  | 0.14  | 176      | 192    | 0    | 106  | AVTQSAEITIPVTFEAR |
| 2018.08                  | 2017.08   | 2016.92  | 0.15  | 13       | 28     | 1    | ---- | SPSWEPFRDWYPAHSR  |

<sup>1</sup> Most acidic spot; putative di-phosphorylated Hsp25: (P14602) Heat shock 27 kDa protein (Hsp 27, Hsp 25), Mass: 23000, Score: 359

<sup>2</sup> Additional peptides for which there was no match (and which could include post-translationally modified Hsp25 peptides): 1035.55, 1047.55, 1061.58, 1063.55, 1071.72, **1085.53**, 1087.56, 1089.56, 1101.53, 1108.64, 1117.52, 1126.65, 1148.67, **1155.63**, 1165.68, 1171.68, 1175.72, 1179.69, 1187.67, 1277.80, 1282.78, 1307.78, 1314.88, 1316.87, 1424.88, 1425.87, 1475.87, 1528.93, 1701.03, 1794.95, 1820.07, 1923.07, 1941.09, 1941.09, 1969.22, 1985.22, 1987.23, 1987.23, 2003.23, 2079.28, 2079.28, 2091.31, 2230.38, 2262.34, 2297.37, 2334.47, 2408.24, 2419.44, 2565.38, 2662.57, 2663.58, 2679.58, 2914.76, 3094.89, 3111.93, 3194.00, 3339.00, 3339.00, 3346.89, 3347.98, 3355.05. The peptides in **bold** include the one in Table 2 (1085.53), but also a second one (1155.63) which is absent in both the putative non-phosphorylated Hsp25

(Supplemental Table 1) and mono-phosphorylated Hsp25 (Supplemental Table 2), matches the Exper. Mr for a peptide comprised of residues 84 – 93 with one phosphorylation, is predicted to be phosphorylated on serine 86 by NetPhos 2.0 software, and includes a serine residue previously shown by others to be phosphorylated (serine 86).
